# Supplementary material for: Night work and prostate cancer in men: a Swedish prospective cohort study
Source: PubMed Central journal article supplement — BMJ Open. 2017 Jun 8;7(6):e015751. doi: 10.1136/bmjopen-2016-015751 (PMC5541514; doi:10.1136/bmjopen-2016-015751), 2017-06-08
Supplement: bmjopen-2016-015751.draft_revisions.pdf [file bmjopen-2016-015751.draft_revisions.pdf]

# BMJ Open

## Night work and prostate cancer in men – a Swedish prospective cohort study

|                                 |                                                                                                                                                                                                                                                                                                                                                                                                                                    |
|---------------------------------|------------------------------------------------------------------------------------------------------------------------------------------------------------------------------------------------------------------------------------------------------------------------------------------------------------------------------------------------------------------------------------------------------------------------------------|
| Journal:                        | <i>BMJ Open</i>                                                                                                                                                                                                                                                                                                                                                                                                                    |
| Manuscript ID                   | bmjopen-2016-015751                                                                                                                                                                                                                                                                                                                                                                                                                |
| Article Type:                   | Research                                                                                                                                                                                                                                                                                                                                                                                                                           |
| Date Submitted by the Author:   | 30-Dec-2016                                                                                                                                                                                                                                                                                                                                                                                                                        |
| Complete List of Authors:       | Åkerstedt, Torbjørn; Stockholm University, Stress Research Institute<br>Narusyte, Jurgita; Karolinska Institute, Clinical Neuroscience<br>Svedberg, Pia; Karolinska Institute, Department of Clinical Neuroscience<br>Kecklund, Göran; Stockholm University, Stress Research Institute;<br>Radboud University, Behavioural Science Institute<br>Alexanderson, Kristina; karolinska institutet, Department of Clinical Neuroscience |
| <b>Primary Subject Heading</b>: | Epidemiology                                                                                                                                                                                                                                                                                                                                                                                                                       |
| Secondary Subject Heading:      | Occupational and environmental medicine                                                                                                                                                                                                                                                                                                                                                                                            |
| Keywords:                       | shift work, work hours, cohort study                                                                                                                                                                                                                                                                                                                                                                                               |
|                                 |                                                                                                                                                                                                                                                                                                                                                                                                                                    |

SCHOLARONE™  
Manuscripts

# Night work and prostate cancer in men – a Swedish prospective cohort study

Torbjörn Åkerstedt<sup>1,2</sup>, Jurgita Narusyte<sup>1</sup>, Pia Svedberg<sup>1</sup>, Göran Kecklund<sup>2,3</sup>, Kristina Alexanderson<sup>1</sup>

1. Department of Clinical Neuroscience, Karolinska Institutet, Stockholm, Sweden

2. Stress Research Institute, Stockholm University, Stockholm, Sweden

3. Behavioral Science Institute, Radboud University, Nijmegen, The Netherlands

Correspondence: Dr Torbjorn Akerstedt, Department of Clinical Neuroscience, Karolinska Institutet, 17177 Stockholm Sweden

Email: [torbjorn.akerstedt@ki.se](mailto:torbjorn.akerstedt@ki.se)

Phone: +46 737078928

Key words: shift work, longitudinal, night work, cancer

## ABSTRACT

**Objectives:** Prostate cancer is the most common cancer and the second leading cause of cancer-related deaths among men, but the contributing factors are unclear. One such may be night work because of the day/night alternation of work and the resulting disturbance of the circadian system. The purpose of the present study was to investigate the prospective relation between number of years with night work and prostate cancer in men.

**Design:** Cohort study comparing night and day working twins with respect to incident prostate cancer in 12322 men.

**Setting:** Individuals in the Swedish Twin Registry.

**Participants:** 12322 male twins

**Outcome measures:** Prostate Cancer diagnoses obtained from the Swedish Cancer Registry with a follow-up time of 12 years, with a total number of cases = 454.

**Results:** Multiple Cox Proportional Hazard regression analysis, adjusted for a number of covariates, showed no association between ever night work and prostate cancer, nor for duration of night work and prostate cancer. Analysis of twin pairs discordant for prostate cancer (N=332) showed no significant association between night work and prostate cancer.

**Conclusions:** The results, together with previous studies, suggest that night work does not seem to constitute a risk factor for prostate cancer.

**Key words:** shift work, night work, men, twins, Sweden

### Strength and weaknesses of this study

- Only a few studies have addressed the issue of night work and prostate cancer and the results are conflicting. The strength of the present study is that it adds a rather large cohort with complete follow-up in national registers
- A second advantage is that the studies also addresses heredity in relation to shift work and prostate cancer
- A disadvantage is the subjective information on exposure and covariates
- Another disadvantage is the lack of information on number of night shifts

## Introduction

Prostate cancer is the most common cancer and the second leading cause of cancer-related deaths among men<sup>1</sup>. The causes may be age, race/ethnicity, and family history<sup>2</sup>, as well as soy and carrots<sup>3,4</sup>. Also firefighters may have an increased risk of prostate cancer<sup>5,6</sup>. The latter group is exposed to various carcinogens, but also to shift work.

Within the European Union (27 countries) 18.7% of the work force work night time (2200-0600h) at least once per month, according to the 5th European Working Conditions Survey ([www.eurofound.europa.eu](http://www.eurofound.europa.eu)). Night work disrupts the sleep wake cycle and it has been suspected that this may increase the risk of cancer. In 2007 the International Agency for Research on Cancer (IARC) carried out a review of available knowledge on the association between breast cancer in women and shift work<sup>7</sup> and concluded that six out of eight studies showed excessive risk for female workers with night shifts to develop breast cancer (Odds Ratios (OR) = 1.3-1.8). This led the IARC to classify shift work in category two on the list of causes of cancer, that is, as a "probable causative link". The effect of duration of exposure was not clear, but a duration of 20 years was suggested by Kolstad<sup>8</sup>, who found limited evidence for an association between night shifts and breast cancer. Several reviews, but not all, point in the same direction<sup>9-13</sup>.

The association between shift work and prostate cancer has not been clearly established and studies on the topic are still rare. However, a recent meta-analysis of 8 very heterogeneous studies concludes that there is a **weak** link (Rao et al 2015), but only three

1  
2  
3 studies show a significant association for “ever shift work”<sup>14-16</sup>. Five other studies failed  
4  
5 to find a significant association<sup>17-21</sup>, although the latter did find a significant association  
6  
7 in the group with >28 years of exposure.  
8  
9

10  
11 The mechanism of the association between night work and cancer is hypothesized to be  
12  
13 influenced by light at night on the level of melatonin, as well as disturbances of the  
14  
15 circadian rhythm<sup>7</sup>. Virtually all studies of mechanisms has been focused on breast, and  
16  
17 not, prostate cancer. But from the breast cancer studies it appears that, for example,  
18  
19 blind women have a lower risk for breast cancer than seeing women<sup>22</sup>. Animal studies  
20  
21 have shown that human breast cancer tumors implanted in mice can be manipulated in  
22  
23 terms of growth by changing the flow of melatonin<sup>23 24</sup>. High levels of melatonin seem to  
24  
25 protect also healthy cells from carcinogenic processes<sup>23 24</sup>. To phase advance the light  
26  
27 exposure in mice increases the malign progression in tumour cells<sup>25</sup>. Female rats with  
28  
29 implanted human breast cancer tumours show growth when the light intensity is  
30  
31 increased and melatonin secretion decreased. Melatonin also suppresses the uptake of  
32  
33 fatty acids during the night<sup>24</sup>.  
34  
35  
36  
37  
38  
39

40 The objective of the present study was to increase the knowledge level regarding the  
41  
42 association between night work and prostate cancer through using data from the  
43  
44 Swedish Twin Registry in which familial factors (genetics and shared environmental)  
45  
46 could be taken into account. Hence, a survey question on number of years of night work  
47  
48 was linked to the incidence of prostate cancer.  
49  
50

## 51 52 53 **Method** 54 55 56 57 58 59 60

### *Design and participants*

The design was a prospective cohort study. Twins born in Sweden before 1959 who participated in the Screening Across the Lifespan Twin (SALT) study conducted by the Swedish Twin Registry (STR), and who at the time of the interview were 41-60 years old were included. Each individual participated in the SALT computer-assisted telephone-interview once between 1998 and March 2003. The response rate was 74% and the total sample encompassed 12322 men. The interview included questions on the duration of night work and a number of items regarding different diseases and symptoms. The procedure for data collection has previously been described in detail <sup>26</sup>. The individuals were followed prospectively from the interview response date. Data on incident cancer were obtained from two registers at the National Board of Health and Welfare; the Swedish Cancer Registry and from the Cause of Death Register and linked to the twins by using the unique person identification number available for all Swedish citizens. The regional ethical committee of the Stockholm region approved the study.

### *Variables*

The exposed group was constituted of those who had worked at night for 1-45 years according to the response to the question: "For how many years have you had working hours that meant that you worked nights at least now and then". This group was compared to all others. In addition, further categorization of exposure was based on intervals in multiples of 5, with observations that an effect may be expected for  $\geq 30$  years or  $\geq 20$  years. However, too few cases were obtained for categorization at  $\geq 30$  years,

1  
2  
3 hence the following categorization was used; 1-5, 6-10, 11-20, and 21-45 years. In total,  
4  
5 4816 male SALT responders had been exposed to night work.  
6  
7

8  
9 Prostate cancer was defined as having at least one incident cancer diagnosis after the  
10  
11 date of the interview, either according to the Cancer Register or to the Cause of Death  
12  
13 Register.  
14

15  
16  
17 The following variables were used as covariates: Age, educational level (0=Compulsory  
18  
19 [reference], 1=More than compulsory,). Tobacco Use (0=No tobacco [reference],  
20  
21 1=Tobacco use (includes current or previous regular smoking/snuffing as well as  
22  
23 occasional smoking or snuffing)). Alcohol use (0=No alcohol consumption [reference],  
24  
25 1=alcohol consumption). Physical activity (0=moderate exercise [reference], 1=low  
26  
27 exercise, 2=high exercise based on this question in SALT: "Of these 7 alternatives, which  
28  
29 fits your annual exercise pattern?"). Body mass index (BMI – height<sup>2</sup>/weight) (0=Normal  
30  
31 weight (>18.5-25) [reference], 1=underweight (≤18.5), 3=Overweight (>25-30),  
32  
33 4=Obesity (>30)). Only one participant was underweight and was removed. Have  
34  
35 children (0=No biological children [reference], 1=have biological children). Coffee use  
36  
37 (1=No coffee [reference], 2=1-2 cups a day, 3=3-4 cups a day; 4=≥5 cups a day). Previous  
38  
39 cancer (0=No [reference], 1= Yes) at the time of interview.  
40  
41  
42  
43  
44  
45

#### 46 47 *Statistical analysis* 48

49  
50  
51 Frequencies were used to describe the background and covariates of the study  
52  
53 population. The differences between day and night workers were tested by Chi-square  
54  
55 test for categorical variables and t-test for continuous variables. In the analyses of  
56  
57  
58  
59



1  
2  
3 associations, people with missing information on a specific covariate were excluded in  
4  
5 the analyses including that covariate. Multiple Cox Proportional Hazard regression  
6  
7 analyses for covariates were used to compute Hazards Ratios (HR) with 95% Confidence  
8  
9 Intervals (CI). Exposure was defined as night work (or not) with a subdivision for  
10  
11 duration of exposure. All individuals contributed with time until date of the first  
12  
13 prostate cancer diagnosis or censoring. Censoring events included other cancer  
14  
15 diagnosis during the follow-up, date of death, or end of follow-up time (31/12/2010),  
16  
17 whichever came first. The analyses were adjusted for the statistical within-twin pair  
18  
19 dependency. Potential familial confounding was controlled for by analyzing twin pairs  
20  
21 discordant for prostate cancer (i.e., one twin in a pair was diagnosed with prostate  
22  
23 cancer during the follow-up, whereas the twin partner not). Conditional Cox  
24  
25 Proportional Hazard regression was applied, where each twin pair was provided with  
26  
27 their own baseline hazard. All analyses were performed using SAS.9.4.  
28  
29  
30  
31  
32

## 33 **Results**

34  
35  
36  
37  
38 The mean follow-up time was 8.7 years (range: 0-13). The total number of person-years  
39  
40 in the cohort when participants were censored after death, time of diagnosis, or after 31  
41  
42 December 2010 was 107545. Prostate cancer occurred in 454 men between baseline  
43  
44 and the last day of the complete follow-up, and 538 men died during follow-up.  
45  
46  
47  
48

49 Background information is presented in table 1. Night workers were slightly younger,  
50  
51 used more tobacco, were more overweight, consumed more coffee, and did not differ  
52  
53 from non-night workers on previous or later cancer or time to diagnosis of prostate  
54  
55 cancer.  
56  
57  
58  
59  
60

1  
2  
3 Table 1  
4  
5  
6

7 The cumulative incidence of prostate cancer was 3.3% among the night workers and  
8 3.9% among non-night workers ( $\chi^2=3.66$ ,  $p=0.16$ ). Table 2 shows that the incidence was  
9 higher in the group with the highest exposure. Results of the Cox regression analyses,  
10 regardless of years of night work exposure, did not show any significant association to  
11 prostate cancer after adjustment for covariates-(Table 2). No association with duration  
12 of night work was seen.  
13  
14  
15  
16  
17  
18  
19  
20  
21  
22

23 Table 2 here  
24  
25  
26

27 The analysis of twin pairs discordant for prostate cancer did not show any significant  
28 associations, irrespective of exposure duration (see Table 3).  
29  
30  
31  
32

33 Table 3 here  
34  
35  
36  
37

38 Alcohol consumption was not entered into the main analysis, since the internal loss of  
39 data was > 50% for this variable. However, a separate analysis showed that the  
40 estimates with adjustment for alcohol was HR=0.64 (95% CI=0.40-1.03) for the  
41 exposure group with 21-45 hours of night-work (N = 5444).  
42  
43  
44  
45  
46  
47  
48

49 Table 3 here  
50  
51  
52

53 **Discussion**  
54  
55  
56  
57  
58  
59  
60

1  
2  
3 In this prospective cohort study of Swedish twins we did not find any statistically  
4 significant association between the amount of night work and prostate cancer. Familial  
5 influences on the association were of minor importance. The results are similar to those  
6 of five previous studies<sup>17-21</sup>, but at least three studies did show a significant association  
7 for “ever night work” and prostate cancer<sup>14-16</sup>. The present results add another negative  
8 finding the previous five studies. Thus, six studies (including the present one) fail to  
9 associate night work with prostate cancer, while three do not. This will move the  
10 metaanalytic HR of Rao et al<sup>27</sup> closer to unity and uncertainty. There is clearly a need for  
11 more studies on the present topic.  
12  
13  
14  
15  
16  
17  
18  
19  
20  
21  
22  
23

24 The discrepancy in results may be due to lack of a common exposure metric, differences  
25 in the type of covariates adjusted for, or heterogenous occupational groups involved.  
26  
27 Furthermore, selection into and out of night work occurs continuously and this may  
28 attenuate any associations. It is also likely that the variability of results simply reflects a  
29 true lack of association between night work and prostate cancer. The present authors  
30 favor this latter explanation in view of the presently available data. Nevertheless, the  
31 issue of a potential association between night work and prostate cancer is far from  
32 settled.  
33  
34  
35  
36  
37  
38  
39  
40  
41  
42  
43

44 It should be pointed out that also the association between night work and breast cancer  
45 in women is weak, even if meta-analyses in most cases produce significant results<sup>9-13</sup>.  
46  
47 Also regarding breast cancer, about half of the studies fail to find significant associations  
48 between night work and breast cancer, but the total number of studies is about twice  
49 that of the studies of prostate cancer.  
50  
51  
52  
53  
54  
55  
56  
57  
58  
59  
60

1  
2  
3 The present study had some additional limitations. Thus, the sample had an  
4  
5 intermediate size, exposure was self-reported, information on occupation/work task  
6  
7 was not available. Furthermore, there was no possibility of estimating exposure to night  
8  
9 work after the baseline measure. Another limitation is that the result concerned Swedish  
10  
11 twins, which may limit generalizability. However, studies have shown that cumulative  
12  
13 risks of cancer and mortality in twins do not differ from that in singletons<sup>28</sup>. A strength  
14  
15 of the study was the linkage at the individual level to nationwide register data through  
16  
17 the social security number assigned to all persons living in Sweden. This resulted in an  
18  
19 almost 100% complete follow-up of disease.  
20  
21  
22  
23

24  
25 It is apparent that possible associations between night work and prostate cancer need to  
26  
27 be studied in more detail. The present negative results add to the previous negative  
28  
29 results, which dominate previously conducted studies. There is also a need for studies  
30  
31 employing better research methods. This includes well-defined measurement of  
32  
33 exposure, preferably using frequency of night shift in addition to duration of exposure.  
34  
35 Future studies also needs objective (company records) measures of exposure, rather  
36  
37 than self-reported ones as well as repeated application of such measures. There is also a  
38  
39 need for studying this in specific occupational groups.  
40  
41  
42  
43

44  
45 To conclude, in this prospective study of Swedish twins we found no evidence that night  
46  
47 work, regardless of duration, is associated to prostate cancer. This agrees with the  
48  
49 majority ,of the previous studies.  
50  
51  
52  
53  
54  
55  
56  
57  
58  
59  
60

1  
2  
3 **Contributions:** TÅ initiated the study, discussed the analyses, and wrote the  
4 manuscript. JN discussed the design, carried out the analyses, and commented on the  
5 manuscript. PS and KA discussed the design, supervised the analyses, and commented  
6 on the manuscript. GK commented on the manuscript.  
7  
8  
9  
10

11  
12  
13  
14 **Funding:** This study was funded by the AFA Insurance Company (grant number  
15 120264)  
16

17  
18 **Conflicting interests:** None declared  
19

20  
21 **Ethical approval:** The ethical committee for the Stockholm Region  
22

23 **Provenance and peer review:** Not commissioned, externally peer reviewed  
24

25 **Data sharing statement:** The data cannot be made publically available. According to  
26 the Swedish Ethical Review Act, The Personal Data Act, and the Administrative  
27 Procedure Act, data can only be made available after legal review, for researchers who  
28 meet the criteria for access to this type of sensitive and confidential data. Readers may  
29 contact professor Kristina Alexanderson ([Kristina.alexanderson@ki.se](mailto:Kristina.alexanderson@ki.se)) regarding the  
30 data.  
31  
32  
33  
34  
35  
36  
37  
38  
39  
40  
41  
42

## 43 **References**

- 44 1. Ferlay J, Shin HR, Bray F, et al. Estimates of worldwide burden of cancer in 2008: GLOBOCAN  
45 2008. *International journal of cancer Journal international du cancer* 2010;**127**(12):2893-917.  
46
- 47 2. Jemal A, Siegel R, Ward E, et al. Cancer statistics, 2009. *CA: a cancer journal for clinicians*  
48 2009;**59**(4):225-49.  
49
- 50 3. van Die MD, Bone KM, Williams SG, et al. Soy and soy isoflavones in prostate cancer: a  
51 systematic review and meta-analysis of randomized controlled trials. *BJU international*  
52 2014;**113**(5b):E119-30.  
53  
54  
55  
56  
57  
58  
59

- 1  
2  
3 4. Xu X, Cheng Y, Li S, et al. Dietary carrot consumption and the risk of prostate cancer. *European*  
4  
5 *journal of nutrition* 2014;**53**(8):1615-23.
- 6  
7 5. Pukkala E, Martinsen JI, Weiderpass E, et al. Cancer incidence among firefighters: 45 years of  
8  
9 follow-up in five Nordic countries. *Occupational and Environmental Medicine*  
10  
11 2014;**71**(6):398-404.
- 12  
13 6. LeMasters GK, Genaidy AM, Succop P, et al. Cancer risk among firefighters: a review and meta-  
14  
15 analysis of 32 studies. *Journal of Occupationa and Environmental Medicine*  
16  
17 2006;**48**(11):1189-202.
- 18  
19 7. Stevens RG. Testing the light-at-night (LAN) theory for breast cancer causation. *Chronobiology*  
20  
21 *International* 2011;**28**(8):653-6.
- 22  
23 8. Kolstad HA. Nightshift work and risk of breast cancer and other cancers--a critical review of the  
24  
25 epidemiologic evidence. *Scandinavian Journal of Work, Environment and Health*  
26  
27 2008;**34**(1):5-22.
- 28  
29 9. Bonde JP, Hansen J, Kolstad HA, et al. Work at night and breast cancer - report on evidence-based  
30  
31 options for preventive actions. *Scandinavian Journal of Work, Environment and Health* 2012.
- 32  
33 10. Jia YJ, Lu YS, Wu KJ, et al. Does night work increase the risk of breast cancer? A systematic  
34  
35 review and meta-analysis of epidemiological studies. *Cancer Epidemiol* 2013;**37**(3):197-206.
- 36  
37 11. Wang F, Yeung KL, Chan WC, et al. A meta-analysis on dose-response relationship between night  
38  
39 shift work and the risk of breast cancer. *Annals of Oncology* 2013;**24**(11):2724-32.
- 40  
41 12. Ijaz S, Verbeek J, Seidler A, et al. Night-shift work and breast cancer--a systematic review and  
42  
43 meta-analysis. *Scandinavian journal of work, environment & health* 2013;**39**(5):431-47.
- 44  
45 13. Kamdar BB, Tergas AI, Mateen FJ, et al. Night-shift work and risk of breast cancer: a systematic  
46  
47 review and meta-analysis. *Breast cancer research and treatment* 2013;**138**(1):291-301.
- 48  
49 14. Kubo T, Ozasa K, Mikami K, et al. Prospective cohort study of the risk of prostate cancer among  
50  
51 rotating-shift workers: findings from the Japan collaborative cohort study. *American Journal*  
52  
53 *of Epidemiology* 2006;**164**(6):549-55.
- 54  
55 15. Conlon M, Lightfoot N, Kreiger N. Rotating shift work and risk of prostate cancer. *Epidemiology*  
56  
57 2007;**18**(1):182-3.

- 1  
2  
3 16. Parent ME, El-Zein M, Rousseau MC, et al. Night work and the risk of cancer among men.  
4  
5 American Journal of Epidemiology 2012;**176**(9):751-9.  
6
- 7 17. Schwartzbaum J, Ahlbom A, Feychting M. Cohort study of cancer risk among male and female  
8  
9 shift workers. Scandinavian Journal of Work, Environment and Health 2007;**33**(5):336-43.  
10
- 11 18. Kubo T, Oyama I, Nakamura T, et al. Industry-based retrospective cohort study of the risk of  
12  
13 prostate cancer among rotating-shift workers. International Journal of Urology  
14  
15 2011;**18**(3):206-11.  
16
- 17 19. Gapstur SM, Diver WR, Stevens VL, et al. Work schedule, sleep duration, insomnia, and risk of  
18  
19 fatal prostate cancer. American Journal of Preventive Medicine 2014;**46**(3 Suppl 1):S26-33.  
20
- 21 20. Yong M, Blettner M, Emrich K, et al. A retrospective cohort study of shift work and risk of  
22  
23 incident cancer among German male chemical workers. Scandinavian Journal of Work,  
24  
25 Environment and Health 2014;**40**(5):502-10.  
26
- 27 21. Papantoniou K, Castano-Vinyals G, Espinosa A, et al. Night shift work, chronotype and prostate  
28  
29 cancer risk in the MCC-Spain case-control study. International journal of cancer Journal  
30  
31 international du cancer 2015;**137**(5):1147-57.  
32
- 33 22. Flynn-Evans EE, Stevens RG, Tabandeh H, et al. Total visual blindness is protective against breast  
34  
35 cancer. Cancer Causes and Control 2009;**20**(9):1753-6.  
36
- 37 23. Blask DE. Melatonin, sleep disturbance and cancer risk. Sleep Medicine Review 2009;**13**(4):257-  
38  
39 64.  
40
- 41 24. Blask DE, Hill SM, Dauchy RT, et al. Circadian regulation of molecular, dietary, and metabolic  
42  
43 signaling mechanisms of human breast cancer growth by the nocturnal melatonin signal and  
44  
45 the consequences of its disruption by light at night. Journal of Pineal Research  
46  
47 2011;**51**(3):259-69.  
48
- 49 25. Filipski E, Delaunay F, King VM, et al. Effects of chronic jet lag on tumor progression in mice.  
50  
51 Cancer Research 2004;**64**(21):7879-85.  
52
- 53 26. Lichtenstein P, Defaire U, Floderus B, et al. The Swedish Twin Registry: A unique resource for  
54  
55 clinical, epidemiological and genetic studies. Journal of Internal Medicine 2002;**252**:184-205.  
56  
57  
58  
59  
60

- 1  
2  
3 27. Rao DP, Yu HF, Bai Y, et al. Does night-shift work increase the risk of prostate cancer? a  
4  
5 systematic review and meta-analysis. *Oncotargets Ther* 2015;**8**:2817-26.  
6  
7 28. Oberg S, Cnattingius S, Sandin S, et al. Twinship influence on morbidity and mortality across the  
8  
9 lifespan. *Int J Epidemiol* 2012;**41**(4):1002-9.  
10  
11  
12  
13  
14  
15  
16  
17  
18  
19  
20  
21  
22  
23  
24  
25  
26  
27  
28  
29  
30  
31  
32  
33  
34  
35  
36  
37  
38  
39  
40  
41  
42  
43  
44  
45  
46  
47  
48  
49  
50  
51  
52  
53  
54  
55  
56  
57  
58  
59  
60



**Table 1.** Characteristics of the study population at baseline, N (%).

|                                              | Number of individuals (%)      |                            | p-value |
|----------------------------------------------|--------------------------------|----------------------------|---------|
|                                              | Non-night workers<br>(n=7 506) | Night workers<br>(n=4 816) |         |
| <b>Age, years</b>                            | 51.7(4.7)                      | 51.2(4.8)                  | <0.001  |
| <b>Education</b>                             |                                |                            | 0.06    |
| Compulsory                                   | 3069 (41%)                     | 2071 (43%)                 |         |
| More than compulsory                         | 4434 (59%)                     | 2744 (57%)                 |         |
| Missing                                      | 3 (0.04%)                      | 1 (0.02%)                  |         |
| <b>Children</b>                              |                                |                            | 0.35    |
| Have children                                | 6122 (82%)                     | 3960 (82%)                 |         |
| Do not have children                         | 1384 (18%)                     | 856 (18%)                  |         |
| Missing                                      | -                              | -                          |         |
| <b>Tobacco use</b>                           |                                |                            | <0.001  |
| No                                           | 919 (12%)                      | 410 (8%)                   |         |
| Yes                                          | 6506 (87%)                     | 4359 (91%)                 |         |
| Missing                                      | 81 (1%)                        | 47 (1%)                    |         |
| <b>BMI</b>                                   |                                |                            | <0.001  |
| Normal weight                                | 3570 (48%)                     | 2099 (42%)                 |         |
| Under weight                                 | 30 (0.4%)                      | 10 (0.2%)                  |         |
| Over weight                                  | 3325 (44%)                     | 2278 (47%)                 |         |
| Obesity                                      | 530 (7%)                       | 500 (10%)                  |         |
| Missing                                      | 51 (0.7%)                      | 19 (0.4%)                  |         |
| <b>Physical activity</b>                     |                                |                            | 0.04    |
| Moderate                                     | 1968 (26%)                     | 1209 (25%)                 |         |
| Low                                          | 2332 (31%)                     | 1509 (31%)                 |         |
| High                                         | 3192 (43%)                     | 2077 (43%)                 |         |
| Missing                                      | 14 (0.2%)                      | 21 (0.4%)                  |         |
| <b>Alcohol consumption</b>                   |                                |                            | <0.001  |
| No alcohol                                   | 147 (2%)                       | 116 (2%)                   |         |
| Alcohol                                      | 3343 (45%)                     | 1954 (41%)                 |         |
| Missing                                      | 4016 (53%)                     | 2746 (57%)                 |         |
| <b>Coffee consumption</b>                    |                                |                            | <0.001  |
| No coffee                                    | 471 (6%)                       | 311 (6%)                   |         |
| 1-2 cups a day                               | 1298 (17%)                     | 789 (16%)                  |         |
| 3-4 cups a day                               | 2595 (35%)                     | 1437 (30%)                 |         |
| 5+ cups a day                                | 3140 (42%)                     | 2272 (47%)                 |         |
| Missing                                      | 2 (0.03%)                      | 7 (0.2%)                   |         |
| <b>Previous cancer</b>                       |                                |                            | 0.14    |
| No                                           | 7319 (98%)                     | 4716 (98%)                 |         |
| Yes                                          | 187 (2%)                       | 100 (2%)                   |         |
| Missing                                      | -                              | -                          |         |
| <b>New cancer diagnosis during follow-up</b> |                                |                            | 0.16    |
| No cancer                                    | 6870 (92%)                     | 4419 (92%)                 |         |
| Prostate                                     | 294 (4%)                       | 160 (3%)                   |         |

|   |                                          |           |           |      |
|---|------------------------------------------|-----------|-----------|------|
| 1 |                                          |           |           |      |
| 2 |                                          |           |           |      |
| 3 | Other cancer                             | 342 (4%)  | 237 (5%)  |      |
| 4 | <b>Time to prostate cancer diagnosis</b> |           |           |      |
| 5 | <b>(years(sd))</b>                       | 5.8 (2.7) | 6.1 (2.7) | 0.24 |
| 6 |                                          |           |           |      |

7 Significance levels based on t-tests or  $\chi^2$  tests.

8

9

10

11

12

13

14

15

16

17

18

19

20

21

22

23

24

25

26

27

28

29

30

31

32

33

34

35

36

37

38

39

40

41

42

43

44

45

46

47

48

49

50

51

52

53

54

55

56

57

58

59

60

For peer review only

**Table 2.** Hazard Ratios (HR) for shift work exposure groups applying multiple Cox analysis for prediction of prostate cancer<sup>1</sup> after baseline among male night workers, and with 95% Confidence Intervals (CI). Reference: non-exposed. N=12,322, Total number of cases=454.

|                                                                                                                                       | Duration of exposure, years | Cases/no cases | Complete follow-up HR (95% CI) <sup>a</sup> | Follow-up to 60 years HR (95% CI) <sup>b</sup> |
|---------------------------------------------------------------------------------------------------------------------------------------|-----------------------------|----------------|---------------------------------------------|------------------------------------------------|
| <b>No night work vs ever night work</b>                                                                                               |                             |                |                                             |                                                |
| No night work [ref]                                                                                                                   | 0                           | 294/7212       | 1                                           | 1                                              |
| Working nights for: (unadjusted)                                                                                                      | 1-45 years                  | 160/4656       | 0.84 (0.69-1.03)                            | <b>0.78 (0.64-0.96)</b>                        |
| No night work [ref]                                                                                                                   | 0                           | 294/7212       | 1                                           | 1                                              |
| Working nights for: (adjusted) <sup>2</sup>                                                                                           | 1-45 years                  | 160/4656       | 0.91 (0.74-1.12)                            | 0.89 (0.72-1.09)                               |
| <b>No night work vs years of shift work</b>                                                                                           |                             |                |                                             |                                                |
| No night work [ref]                                                                                                                   | 0 years                     | 294/7212       | 1                                           | 1                                              |
| Working nights for: (unadjusted)                                                                                                      | 1-5 years                   | 55/1729        | 0.79 (0.60-1.06)                            | <b>0.72 (0.54-0.96)</b>                        |
|                                                                                                                                       | 6-10 years                  | 31/800         | 0.99 (0.68-1.43)                            | 0.88 (0.61-1.27)                               |
|                                                                                                                                       | 11-20 years                 | 38/968         | 1.00 (0.72-1.41)                            | 0.84 (0.60-1.18)                               |
|                                                                                                                                       | 21-45 years                 | 36/1159        | 0.77 (0.55-1.09)                            | 0.86 (0.61-1.21)                               |
| No night work [ref]                                                                                                                   | 0 years                     | 294/7212       | 1                                           | 1                                              |
| Working nights for: (adjusted) <sup>2</sup>                                                                                           | 1-5 years                   | 55/1729        | 0.86 (0.63-1.17)                            | 0.84 (0.62-1.15)                               |
|                                                                                                                                       | 6-10 years                  | 31/800         | 1.09 (0.74-1.61)                            | 0.96 (0.65-1.42)                               |
|                                                                                                                                       | 11-20 years                 | 38/968         | 1.12 (0.78-1.63)                            | 1.11 (0.77-1.60)                               |
|                                                                                                                                       | 21-45 years                 | 36/1159        | 0.72 (0.50-1.05)                            | 0.75 (0.52-1.09)                               |
| Note: <sup>1</sup> no cancer as reference;                                                                                            |                             |                |                                             |                                                |
| <sup>2</sup> Adjusted for: age + education level + tobacco consumption + BMI + having children + coffee consumption + previous cancer |                             |                |                                             |                                                |
| <sup>a</sup> : follow-up until December 31 2010, <sup>b</sup> : follow-up until the age of 60.                                        |                             |                |                                             |                                                |

Table 3. Hazard Ratios (HR) for shift work exposure groups applying conditional Cox analysis of twin pairs discordant for prostate cancer<sup>1</sup> for prediction of prostate cancer after baseline among male night workers, and with 95% Confidence Intervals (CI). N=332.

|                     | <b>Duration of exposure, years</b> | <b>N (%)</b> | <b>Complete follow-up HR (95% CI)<sup>a</sup></b> | <b>Follow-up to 60 years HR (95% CI)<sup>b</sup></b> |
|---------------------|------------------------------------|--------------|---------------------------------------------------|------------------------------------------------------|
| No night work [ref] | 0 years                            | 225 (68)     | 1                                                 | 1                                                    |
| Working nights for: | 1-5 years                          | 42 (13)      | 1.02 (0.48-2.18)                                  | 0.88 (0.26-2.46)                                     |
|                     | 6-10 years                         | 19 (6)       | 1.97 (0.64-6.02)                                  | 1.24 (0.26-5.82)                                     |
|                     | 11-20 years                        | 22 (7)       | 0.88 (0.32-2.43)                                  | 0.87 (0.26-2.93)                                     |
|                     | 21-45 years                        | 24 (7)       | 1.05 (0.39-2.84)                                  | 0.57 (0.13-2.45)                                     |

Note: <sup>1</sup> no cancer as reference;  
<sup>a</sup>: follow-up until December 31 2010, <sup>b</sup>: follow-up until the age of 60.

STROBE Statement—Checklist of items that should be included in reports of *cohort studies*

|                              | Item No | Recommendation                                                                                                                                                                                                                                                                                                                                    |
|------------------------------|---------|---------------------------------------------------------------------------------------------------------------------------------------------------------------------------------------------------------------------------------------------------------------------------------------------------------------------------------------------------|
| <b>Title and abstract</b>    | 1       | (a) Indicate the study's design with a commonly used term in the title or the abstract p2<br>(b) Provide in the abstract an informative and balanced summary of what was done and what was found p2                                                                                                                                               |
| <b>Introduction</b>          |         |                                                                                                                                                                                                                                                                                                                                                   |
| Background/rationale         | 2       | Explain the scientific background and rationale for the investigation being reported p4                                                                                                                                                                                                                                                           |
| Objectives                   | 3       | State specific objectives, including any prespecified hypotheses p5                                                                                                                                                                                                                                                                               |
| <b>Methods</b>               |         |                                                                                                                                                                                                                                                                                                                                                   |
| Study design                 | 4       | Present key elements of study design early in the paper p6                                                                                                                                                                                                                                                                                        |
| Setting                      | 5       | Describe the setting, locations, and relevant dates, including periods of recruitment, exposure, follow-up, and data collection p6 & p8                                                                                                                                                                                                           |
| Participants                 | 6       | (a) Give the eligibility criteria, and the sources and methods of selection of participants. Describe methods of follow-up p6<br>(b) For matched studies, give matching criteria and number of exposed and unexposed na                                                                                                                           |
| Variables                    | 7       | Clearly define all outcomes, exposures, predictors, potential confounders, and effect modifiers. Give diagnostic criteria, if applicable p6-7                                                                                                                                                                                                     |
| Data sources/<br>measurement | 8*      | For each variable of interest, give sources of data and details of methods of assessment (measurement). Describe comparability of assessment methods if there is more than one group p6                                                                                                                                                           |
| Bias                         | 9       | Describe any efforts to address potential sources of bias p7                                                                                                                                                                                                                                                                                      |
| Study size                   | 10      | Explain how the study size was arrived at p6                                                                                                                                                                                                                                                                                                      |
| Quantitative variables       | 11      | Explain how quantitative variables were handled in the analyses. If applicable, describe which groupings were chosen and why p7-8                                                                                                                                                                                                                 |
| Statistical methods          | 12      | (a) Describe all statistical methods, including those used to control for confounding p7-8<br>(b) Describe any methods used to examine subgroups and interactions p8<br>(c) Explain how missing data were addressed p8<br>(d) If applicable, explain how loss to follow-up was addressed p8<br>(e) Describe any sensitivity analyses p9           |
| <b>Results</b>               |         |                                                                                                                                                                                                                                                                                                                                                   |
| Participants                 | 13*     | (a) Report numbers of individuals at each stage of study—eg numbers potentially eligible, examined for eligibility, confirmed eligible, included in the study, completing follow-up, and analysed p6<br>(b) Give reasons for non-participation at each stage p6<br>(c) Consider use of a flow diagram na                                          |
| Descriptive data             | 14*     | (a) Give characteristics of study participants (eg demographic, clinical, social) and information on exposures and potential confounders p8<br>(b) Indicate number of participants with missing data for each variable of interest na<br>(no missing data – complete follow-up)<br>(c) Summarise follow-up time (eg, average and total amount) p8 |
| Outcome data                 | 15*     | Report numbers of outcome events or summary measures over time p8                                                                                                                                                                                                                                                                                 |
| Main results                 | 16      | (a) Give unadjusted estimates and, if applicable, confounder-adjusted estimates and their precision (eg, 95% confidence interval). Make clear which confounders were                                                                                                                                                                              |

|                          |    |                                                                                                                                                                                       |
|--------------------------|----|---------------------------------------------------------------------------------------------------------------------------------------------------------------------------------------|
|                          |    | adjusted for and why they were included <b>p9</b>                                                                                                                                     |
|                          |    | (b) Report category boundaries when continuous variables were categorized <b>p7</b>                                                                                                   |
|                          |    | (c) If relevant, consider translating estimates of relative risk into absolute risk for a meaningful time period <b>na</b>                                                            |
| Other analyses           | 17 | Report other analyses done—eg analyses of subgroups and interactions, and sensitivity analyses <b>p9</b>                                                                              |
| <b>Discussion</b>        |    |                                                                                                                                                                                       |
| Key results              | 18 | Summarise key results with reference to study objectives <b>p10</b>                                                                                                                   |
| Limitations              | 19 | Discuss limitations of the study, taking into account sources of potential bias or imprecision. Discuss both direction and magnitude of any potential bias <b>p10-11</b>              |
| Interpretation           | 20 | Give a cautious overall interpretation of results considering objectives, limitations, multiplicity of analyses, results from similar studies, and other relevant evidence <b>p11</b> |
| Generalisability         | 21 | Discuss the generalisability (external validity) of the study results <b>p11</b>                                                                                                      |
| <b>Other information</b> |    |                                                                                                                                                                                       |
| Funding                  | 22 | Give the source of funding and the role of the funders for the present study and, if applicable, for the original study on which the present article is based <b>p12</b>              |

\*Give information separately for exposed and unexposed groups.

**Note:** An Explanation and Elaboration article discusses each checklist item and gives methodological background and published examples of transparent reporting. The STROBE checklist is best used in conjunction with this article (freely available on the Web sites of PLoS Medicine at <http://www.plosmedicine.org/>, Annals of Internal Medicine at <http://www.annals.org/>, and Epidemiology at <http://www.epidem.com/>). Information on the STROBE Initiative is available at <http://www.strobe-statement.org>.

# BMJ Open

## Night work and prostate cancer in men – a Swedish prospective cohort study

|                                 |                                                                                                                                                                                                                                                                                                                                                                                                                                    |
|---------------------------------|------------------------------------------------------------------------------------------------------------------------------------------------------------------------------------------------------------------------------------------------------------------------------------------------------------------------------------------------------------------------------------------------------------------------------------|
| Journal:                        | <i>BMJ Open</i>                                                                                                                                                                                                                                                                                                                                                                                                                    |
| Manuscript ID                   | bmjopen-2016-015751.R1                                                                                                                                                                                                                                                                                                                                                                                                             |
| Article Type:                   | Research                                                                                                                                                                                                                                                                                                                                                                                                                           |
| Date Submitted by the Author:   | 27-Mar-2017                                                                                                                                                                                                                                                                                                                                                                                                                        |
| Complete List of Authors:       | Åkerstedt, Torbjørn; Stockholm University, Stress Research Institute<br>Narusyte, Jurgita; Karolinska Institute, Clinical Neuroscience<br>Svedberg, Pia; Karolinska Institute, Department of Clinical Neuroscience<br>Kecklund, Göran; Stockholm University, Stress Research Institute;<br>Radboud University, Behavioural Science Institute<br>Alexanderson, Kristina; karolinska institutet, Department of Clinical Neuroscience |
| <b>Primary Subject Heading</b>: | Epidemiology                                                                                                                                                                                                                                                                                                                                                                                                                       |
| Secondary Subject Heading:      | Occupational and environmental medicine                                                                                                                                                                                                                                                                                                                                                                                            |
| Keywords:                       | shift work, work hours, cohort study                                                                                                                                                                                                                                                                                                                                                                                               |
|                                 |                                                                                                                                                                                                                                                                                                                                                                                                                                    |

SCHOLARONE™  
Manuscripts

# Night work and prostate cancer in men – a Swedish prospective cohort study

Torbjörn Åkerstedt<sup>1,2</sup>, Jurgita Narusyte<sup>1</sup>, Pia Svedberg<sup>1</sup>, Göran Kecklund<sup>2,3</sup>, Kristina Alexanderson<sup>1</sup>

1. Department of Clinical Neuroscience, Karolinska Institutet, Stockholm, Sweden

2. Stress Research Institute, Stockholm University, Stockholm, Sweden

3. Behavioral Science Institute, Radboud University, Nijmegen, The Netherlands

Correspondence: Dr Torbjorn Akerstedt, Department of Clinical Neuroscience, Karolinska Institutet, 17177 Stockholm Sweden

Email: [torbjorn.akerstedt@ki.se](mailto:torbjorn.akerstedt@ki.se)

Phone: +46 737078928

Key words: shift work, longitudinal, night work, cancer



## ABSTRACT

**Objectives:** Prostate cancer is the most common cancer and the second leading cause of cancer-related deaths among men, but the contributing factors are unclear. One such may be night work because of the day/night alternation of work and the resulting disturbance of the circadian system. The purpose of the present study was to investigate the prospective relation between number of years with night work and prostate cancer in men.

**Design:** Cohort study comparing night and day working twins with respect to incident prostate cancer in 12322 men.

**Setting:** Individuals in the Swedish Twin Registry.

**Participants:** 12322 male twins

**Outcome measures:** Prostate Cancer diagnoses obtained from the Swedish Cancer Registry with a follow-up time of 12 years, with a total number of cases = 454.

**Results:** Multiple Cox Proportional Hazard regression analysis, adjusted for a number of covariates, showed no association between ever night work and prostate cancer, nor for duration of night work and prostate cancer. Analysis of twin pairs discordant for prostate cancer (N=332) showed no significant association between night work and prostate cancer.

**Conclusions:** The results, together with previous studies, suggest that night work does not seem to constitute a risk factor for prostate cancer.

**Key words:** shift work, night work, men, twins, Sweden

### Strength and weaknesses of this study

- Only a few studies have addressed the issue of night work and prostate cancer and the results are conflicting. The strength of the present study is that it adds a rather large cohort with complete follow-up in national registers
- A second advantage is that the study also addresses heredity in relation to shift work and prostate cancer
- A disadvantage is that only subjective information on exposure and covariates is available.
- Another disadvantage is the lack of information on number of night shifts

## Introduction

Prostate cancer is the most common cancer and the second leading cause of cancer-related deaths among men.<sup>1</sup> The causes may be age, race/ethnicity, and family history,<sup>2</sup> as well as soy and carrots.<sup>3,4</sup> Also firefighters may have an increased risk of prostate cancer.<sup>5,6</sup> The latter group is exposed to various carcinogens, but also to shift work, and such work hours interfere with the circadian system, particularly if they involve night shifts. Reviewing epidemiological and experimental literature, the International Agency for Research on Cancer (IARC) concluded that night work is a probable causative risk of breast cancer in women, that is, placing night shifts in category 2 on the list of causes of cancer.<sup>7</sup> Furthermore, Kolstad, found that the risk of breast cancer was increased after 20 years or more of exposure to night work.<sup>7</sup> Most, but not all, of subsequent reviews have found support for the link between night shifts and breast cancer in women.<sup>8-12</sup> This link may have important effects on public health since >18% of the population in the European Union is exposed to night work ([www.eurofound.europa.eu](http://www.eurofound.europa.eu)).

In contrast, the association between shift work and prostate cancer has not been clearly established. However, a recent meta-analysis of 8 very heterogeneous studies concluded that there is a weak link,<sup>13</sup> but only three studies show a significant association for “ever shift work”.<sup>14-16</sup> Five other studies failed to find a significant association,<sup>17-21</sup> although the latter did find a significant association in the group with >28 years of exposure.

Apart from the involvement of disturbance of circadian rhythmicity in the putative effect of night work on cancer, it is thought that the suppression of melatonin through night

1  
2  
3 time exposure to light is a contributing factor.<sup>22</sup> Among the evidence is the finding that  
4  
5 blind women have a lower risk for breast cancer than seeing women.<sup>23</sup> Furthermore,  
6  
7 breast cancer growth may be increased by reducing melatonin flow to an implanted  
8  
9 tumor in animals.<sup>24 25</sup> Phase advancing light exposure increases the rate of growth of  
10  
11 cancer cells in mice.<sup>26</sup> When light exposure is increased and melatonin decreased,  
12  
13 cancer tumors increase in growth in female rats with implanted cancer tumors..<sup>25</sup>  
14  
15

16  
17  
18 The objective of the present prospective study was to increase knowledge regarding the  
19  
20 association between night work and prostate cancer through using data from the  
21  
22 Swedish Twin Registry in which familial factors (genetics and shared environmental)  
23  
24 could be taken into account. Hence, a survey question on number of years of night work  
25  
26 was used to predict the incidence of prostate cancer.  
27  
28  
29  
30

## 31 **Method**

### 32 *Design and participants*

33  
34  
35  
36  
37  
38  
39  
40 The design was a prospective cohort study and is essentially identical to that of a  
41  
42 previous study of night shifts and breast cancer in women.<sup>27</sup> Twins born in Sweden  
43  
44 before 1959 who participated in the Screening Across the Lifespan Twin (SALT) study  
45  
46 conducted by the Swedish Twin Registry (STR), and who at the time of the interview  
47  
48 were 41-60 years old were included. Each individual participated in the SALT computer-  
49  
50 assisted telephone-interview once between 1998 and March 2003. The response rate  
51  
52 was 74% and the total sample encompassed 12322 men. The interview included  
53  
54 questions on the duration of night work and a number of items regarding different  
55  
56  
57  
58  
59  
60

1  
2  
3 diseases and symptoms. The procedure for data collection has previously been  
4  
5 described in detail.<sup>28</sup> The individuals were followed prospectively from the interview  
6  
7 response date. Data on incident cancer were obtained from two registers at the National  
8  
9 Board of Health and Welfare; the Swedish Cancer Registry and from the Cause of Death  
10  
11 Register and linked to the twins by using the unique person identification number  
12  
13 available for all Swedish citizens. The regional ethical committee of the Stockholm  
14  
15 region approved the study.  
16  
17  
18  
19

### 20 *Variables*

21  
22  
23  
24 The exposed group was constituted of those who had worked at night for 1-45 years  
25  
26 according to the response to the question: "For how many years have you had working  
27  
28 hours that meant that you worked nights at least now and then". This group was  
29  
30 compared to all others. In addition, further categorization of exposure was based on  
31  
32 intervals in multiples of 5, with observations that an effect may be expected for  $\geq 30$  years  
33  
34 or  $\geq 20$  years. However, too few cases were obtained for categorization at  $\geq 30$  years,  
35  
36 hence the following categorization was used; 1-5, 6-10, 11-20, and 21-45 years. In total,  
37  
38 4816 male SALT responders had been exposed to night work.  
39  
40  
41  
42  
43

44 Prostate cancer was defined as having at least one incident cancer diagnosis after the  
45  
46 date of the interview, either according to the Cancer Register or to the Cause of Death  
47  
48 Register.  
49

50  
51  
52  
53 The following variables were used as covariates: Age, educational level (0=Compulsory  
54  
55 [reference], 1=More than compulsory,). Tobacco Use (0=No tobacco [reference],  
56  
57  
58  
59

1  
2  
3 1=Tobacco use (includes current or previous regular smoking/snuffing as well as  
4 occasional smoking or snuffing)). Alcohol use (0=No alcohol consumption [reference],  
5 1=alcohol consumption). Physical activity (0=moderate exercise [reference], 1=low  
6 exercise, 2=high exercise based on this question in SALT: "Of these 7 alternatives, which  
7 fits your annual exercise pattern?"). Body mass index (BMI – height<sup>2</sup>/weight) (0=Normal  
8 weight (>18.5-25) [reference], 1=underweight (≤18.5), 3=Overweight (>25-30),  
9 4=Obesity (>30)). Only one participant was underweight and was removed. Have  
10 children (0=No biological children [reference], 1=have biological children). Coffee use  
11 (1=No coffee [reference], 2=1-2 cups a day, 3=3-4 cups a day; 4=≥5 cups a day). Previous  
12 cancer (0=No [reference], 1= Yes) at the time of interview.  
13  
14  
15  
16  
17  
18  
19  
20  
21  
22  
23  
24  
25  
26

### 27 *Statistical analysis*

28  
29  
30  
31 Frequencies were used to describe the background and covariates of the study  
32 population. The differences between day and night workers were tested by Chi-square  
33 test for categorical variables and t-test for continuous variables. In the analyses of  
34 associations, people with missing information on a specific covariate were excluded in  
35 the analyses including that covariate. Multiple Cox Proportional Hazard regression  
36 analyses for covariates were used to compute Hazards Ratios (HR) with 95% Confidence  
37 Intervals (CI). Exposure was defined as night work (or not) with a subdivision for  
38 duration of exposure. All individuals contributed with time until date of the first  
39 prostate cancer diagnosis or censoring. Censoring events included other cancer  
40 diagnosis during the follow-up, date of death, or end of follow-up time (31/12/2010),  
41 whichever came first. The analyses were adjusted for the statistical within-twin pair  
42 dependency.  
43  
44  
45  
46  
47  
48  
49  
50  
51  
52  
53  
54  
55  
56  
57  
58  
59  
60

1  
2  
3  
4  
5 The proportional hazards assumption was satisfied, which was examined by testing a  
6  
7 model including an interaction between the night work (yes/no or categorized) and the  
8  
9 survival time as a covariate. Potential familial confounding was controlled for, by  
10  
11 analyzing twin pairs discordant for prostate cancer (i.e., one twin in a pair was  
12  
13 diagnosed with prostate cancer during the follow-up, whereas the twin partner not).  
14  
15 Conditional Cox Proportional Hazard regression was applied, where each twin pair was  
16  
17 provided with their own baseline hazard. All analyses were performed using SAS.9.4.  
18  
19  
20  
21  
22

23 Some of the covariates had missing values and we performed multiple imputations  
24  
25 under the assumption that data were missing at random. The imputation was repeated  
26  
27 20 times using PROC MI in SAS. The values of complete cases were compared with the  
28  
29 imputed values and only marginal deviations were observed.  
30  
31  
32  
33  
34  
35

## 36 **Results**

37  
38  
39  
40  
41 The mean follow-up time was 8.7 years (range: 0-13). The total number of person-years  
42  
43 in the cohort when participants were censored after death, time of diagnosis, or after 31  
44  
45 December 2010 was 107545. Prostate cancer occurred in 454 men between baseline  
46  
47 and the last day of the complete follow-up, and 538 men died during follow-up.  
48  
49  
50

51  
52 Background information is presented in table 1. Night workers were slightly younger,  
53  
54 used more tobacco, were more overweight, consumed more coffee, and did not differ  
55  
56  
57  
58  
59  
60

1  
2  
3 from non-night workers on previous or later cancer or time to diagnosis of prostate  
4  
5 cancer.

6  
7  
8  
9 The cumulative incidence of prostate cancer was 3.3% among the night workers and  
10  
11 3.9% among non-night workers ( $\chi^2=3.66$ ,  $p=0.16$ ). Table 2 shows that the incidence was  
12  
13 higher in the group with the highest exposure. Results of the Cox regression analyses,  
14  
15 regardless of years of night work exposure, did not show any significant association to  
16  
17 prostate cancer after adjustment for covariates (Table 2). No association with duration  
18  
19 of night work was seen. The analysis of twin pairs discordant for prostate cancer did not  
20  
21 show any significant associations, irrespective of exposure duration (see Table 3).  
22  
23  
24  
25

26  
27 Table 2 here  
28  
29  
30

31 Alcohol consumption was not entered into the main analysis, since the internal loss of  
32  
33 data was > 50% for this variable. However, a separate analysis showed that the  
34  
35 estimates with adjustment for alcohol was HR=0.64 (95% CI=0.40-1.03) for the  
36  
37 exposure group with 21-45 hours of night-work (N = 5444).  
38  
39  
40  
41

42 Table 3 here  
43  
44  
45

## 46 Discussion

47  
48  
49  
50

51 In this prospective cohort study of Swedish twins we did not find any statistically  
52  
53 significant association between the amount of night work and prostate cancer. Familial  
54  
55 influences on the association were of minor importance. The results are similar to those  
56  
57  
58  
59  
60



1  
2  
3 of five previous studies,<sup>17-21</sup> but at least three studies did show a significant association  
4 for “ever night work” and prostate cancer.<sup>14-16</sup> The present results add another negative  
5 finding the previous five studies. Thus, six studies (including the present one) fail to  
6 associate night work with prostate cancer, while three do not. This will move the meta-  
7 analytic HR of Rao et al<sup>13</sup> closer to unity and uncertainty. There is clearly a need for  
8 further studies on the present topic.  
9  
10  
11  
12  
13  
14  
15  
16  
17

18 The discrepancy in results may be due to a lack of a common exposure metric,  
19 differences in the type of covariates adjusted for, or heterogeneous occupational groups  
20 involved. Furthermore, selection into and out of night work occurs continuously and this  
21 may attenuate any associations. It is also likely that the variability of results simply  
22 reflects a true lack of association between night work and prostate cancer. The present  
23 authors favor this latter explanation in view of the presently available data.  
24  
25  
26  
27  
28  
29  
30

31 Nevertheless, the issue of a potential association between night work and prostate  
32 cancer is far from settled.  
33  
34  
35  
36  
37

38 It should be pointed out that also the association between night work and breast cancer  
39 in women is weak, even if meta-analyses in most cases produce significant results.<sup>8-12</sup>  
40 Also regarding breast cancer, about half of the studies fail to find significant associations  
41 between night work and breast cancer, but the total number of studies is about twice  
42 that of the studies of prostate cancer.  
43  
44  
45  
46  
47  
48  
49  
50

51 The present study had some additional limitations. Thus, the sample had an  
52 intermediate size, exposure was self-reported, information on occupation/work task  
53 was not available. Furthermore, there was no possibility of estimating exposure to night  
54  
55  
56  
57  
58  
59  
60

1  
2  
3 work after the baseline measure. Another limitation is that the result concerned Swedish  
4  
5 twins, which may limit generalizability. However, studies have shown that cumulative  
6  
7 risks of cancer and mortality in twins do not differ from that in singletons.<sup>29</sup> A strength  
8  
9 of the study was the linkage of exposure at the individual level to nationwide register  
10  
11 data through the social security number assigned to all persons living in Sweden. This  
12  
13 resulted in an almost 100% complete follow-up of disease.  
14  
15

16  
17  
18 It is apparent that possible associations between night work and prostate cancer need to  
19  
20 be studied in more detail. The present negative results add to the previous negative  
21  
22 results, which dominate previously conducted studies. There is also a need for studies  
23  
24 employing better research methods. This includes well-defined measurement of  
25  
26 exposure, preferably using frequency of night shift in addition to duration of exposure.  
27  
28 Future studies also needs objective (company records) measures of exposure, rather  
29  
30 than self-reported ones as well as repeated application of such measures. There is also a  
31  
32 need for studying this in specific occupational groups.  
33  
34  
35

36  
37  
38 To conclude, in this prospective study of Swedish twins we found no evidence that night  
39  
40 work, regardless of duration, is associated to prostate cancer. This agrees with the  
41  
42 majority of the previous studies.  
43  
44  
45

46  
47  
48  
49  
50  
51 **Contributions:** TÅ initiated the study, discussed the analyses, and wrote the  
52  
53 manuscript. JN discussed the design, carried out the analyses, and commented on the  
54  
55  
56  
57  
58  
59

1  
2  
3 manuscript. PS and KA discussed the design, supervised the analyses, and commented  
4  
5 on the manuscript. GK commented on the manuscript.  
6  
7

8  
9 **Funding:** This study was funded by the AFA Insurance Company (grant number  
10  
11 120264)  
12

13  
14 **Conflicting interests:** None declared  
15

16 **Ethical approval:** The ethical committee for the Stockholm Region  
17

18 **Provenance and peer review:** Not commissioned, externally peer reviewed  
19

20 **Data sharing statement:** The data cannot be made publically available. According to  
21  
22 the Swedish Ethical Review Act, The Personal Data Act, and the Administrative  
23  
24 Procedure Act, data can only be made available after legal review, for researchers who  
25  
26 meet the criteria for access to this type of sensitive and confidential data. Readers may  
27  
28 contact professor Kristina Alexanderson ([Kristina.alexanderson@ki.se](mailto:Kristina.alexanderson@ki.se)) regarding the  
29  
30 data.  
31  
32  
33  
34  
35  
36  
37

## 38 **References**

39  
40  
41

- 42 1. Ferlay J, Shin HR, Bray F, *et al.* Estimates of worldwide burden of cancer in 2008: GLOBOCAN  
43  
44 2008. *Int J Cancer* 2010;**127**:2893-917.  
45
- 46 2. Jemal A, Siegel R, Ward E, *et al.* *Cancer Statistics* 2009;**59**:225-49.  
47
- 48 3. van Die MD, Bone KM, Williams SG, *et al.* Soy and soy isoflavones in prostate cancer: a  
49  
50 systematic review and meta-analysis of randomized controlled trials. *BJU Int* 2014;**113**:E119-  
51  
52 30.  
53
- 54 4. Xu X, Cheng Y, Li S, *et al.* Dietary carrot consumption and the risk of prostate cancer. *Eur J Nutr*  
55  
56 2014;**53**:1615-23.  
57  
58  
59  
60

- 1  
2  
3 5. Pukkala E, Martinsen JI, Weiderpass E, *et al.* Cancer incidence among firefighters: 45 years of  
4  
5 follow-up in five Nordic countries. *Occup Environl Med* 2014;**71**:398-404.
- 6  
7 6. LeMasters GK, Genaidy AM, Succop P, *et al.* Cancer risk among firefighters: a review and meta-  
8  
9 analysis of 32 studies. *J Occup Environ Med* 2006;**48**:1189-202.
- 10  
11 7. Kolstad HA. Nightshift work and risk of breast cancer and other cancers--a critical review of the  
12  
13 epidemiologic evidence. *Scand J Work Environ Health* 2008;**34**:5-22.
- 14  
15 8. Bonde JP, Hansen J, Kolstad HA, *et al.* Work at night and breast cancer - report on evidence-based  
16  
17 options for preventive actions. *Scand J Work Environ Health* 2012.
- 18  
19 9. Jia YJ, Lu YS, Wu KJ, *et al.* Does night work increase the risk of breast cancer? A systematic  
20  
21 review and meta-analysis of epidemiological studies. *Cancer Epidemiol* 2013;**37**:197-206.
- 22  
23 10. Wang F, Yeung KL, Chan WC, *et al.* A meta-analysis on dose-response relationship between night  
24  
25 shift work and the risk of breast cancer. *Ann Oncology* 2013;**24**:2724-32.
- 26  
27 11. Ijaz S, Verbeek J, Seidler A, *et al.* Night-shift work and breast cancer--a systematic review and  
28  
29 meta-analysis. *Scand J Work, Evironment health* 2013;**39**:431-47.
- 30  
31 12. Kamdar BB, Tergas AI, Mateen FJ, *et al.* Night-shift work and risk of breast cancer: a systematic  
32  
33 review and meta-analysis. *Breast Cancer Res Treat* 2013;**138**:291-301.
- 34  
35 13. Rao DP, Yu HF, Bai Y, *et al.* Does night-shift work increase the risk of prostate cancer? a  
36  
37 systematic review and meta-analysis. *Oncotargets Ther* 2015;**8**:2817-26.
- 38  
39 14. Kubo T, Ozasa K, Mikami K, *et al.* Prospective cohort study of the risk of prostate cancer among  
40  
41 rotating-shift workers: findings from the Japan collaborative cohort study. *Am J Epidemiol*  
42  
43 2006;**164**:549-55.
- 44  
45 15. Conlon M, Lightfoot N, Kreiger N. Rotating shift work and risk of prostate cancer. *Epidemiol*  
46  
47 2007;**18**:182-3.
- 48  
49 16. Parent ME, El-Zein M, Rousseau MC, *et al.* Night work and the risk of cancer among men. *Am J*  
50  
51 *Epidemiol* 2012;**176**:751-9.
- 52  
53 17. Schwartzbaum J, Ahlbom A, Feychting M. Cohort study of cancer risk among male and female  
54  
55 shift workers. *Scand J Work EnvironHealth* 2007;**33**:336-43.

18. Kubo T, Oyama I, Nakamura T, *et al.* Industry-based retrospective cohort study of the risk of prostate cancer among rotating-shift workers. *Int J Urol* 2011;**18**:206-11.
19. Gapstur SM, Diver WR, Stevens VL, *et al.* Work schedule, sleep duration, insomnia, and risk of fatal prostate cancer. *Am J Prev Med* 2014;**46**(3 Suppl 1):S26-33.
20. Yong M, Blettner M, Emrich K, *et al.* A retrospective cohort study of shift work and risk of incident cancer among German male chemical workers. *Scand J Work, Environ Health* 2014;**40**:502-10.
21. Papantoniou K, Castano-Vinyals G, Espinosa A, *et al.* Night shift work, chronotype and prostate cancer risk in the MCC-Spain case-control study. *International journal of cancer Int J Cancer* 2015;**137**:1147-57.
22. Stevens RG. Testing the light-at-night (LAN) theory for breast cancer causation. *Chronobiol Int* 2011;**28**:653-6.
23. Flynn-Evans EE, Stevens RG, Tabandeh H, *et al.* Total visual blindness is protective against breast cancer. *Cancer Causes and Control* 2009;**20**:1753-6.
24. Blask DE. Melatonin, sleep disturbance and cancer risk. *Sleep Med Rev* 2009;**13**:257-64.
25. Blask DE, Hill SM, Dauchy RT, *et al.* Circadian regulation of molecular, dietary, and metabolic signaling mechanisms of human breast cancer growth by the nocturnal melatonin signal and the consequences of its disruption by light at night. *J Pineal Res* 2011;**51**:259-69.
26. Filipinski E, Delaunay F, King VM, *et al.* Effects of chronic jet lag on tumor progression in mice. *Cancer Res* 2004;**64**:7879-85.
27. Akerstedt T, Knutsson A, Narusyte J, *et al.* Night work and breast cancer in women: a Swedish cohort study. *BMJ Open* 2015;**5**(4):e008127.
28. Lichtenstein P, Defaire U, Floderus B, *et al.* The Swedish Twin Registry: A unique resource for clinical, epidemiological and genetic studies. *J Int Med* 2002;**252**:184-205.
29. Oberg S, Cnattingius S, Sandin S, *et al.* Twinship influence on morbidity and mortality across the lifespan. *Int J Epidemiol* 2012;**41**:1002-9.

**Table 1.** Characteristics of the study population at baseline, N (%).

|                                              | Number of individuals (%)      |                            | p-value |
|----------------------------------------------|--------------------------------|----------------------------|---------|
|                                              | Non-night workers<br>(n=7 506) | Night workers<br>(n=4 816) |         |
| <b>Age, years</b>                            | 51.7(4.7)                      | 51.2(4.8)                  | <0.001  |
| <b>Education</b>                             |                                |                            | 0.06    |
| Compulsory                                   | 3069 (41%)                     | 2071 (43%)                 |         |
| More than compulsory                         | 4434 (59%)                     | 2744 (57%)                 |         |
| Missing                                      | 3 (0.04%)                      | 1 (0.02%)                  |         |
| <b>Children</b>                              |                                |                            | 0.35    |
| Have children                                | 6122 (82%)                     | 3960 (82%)                 |         |
| Do not have children                         | 1384 (18%)                     | 856 (18%)                  |         |
| Missing                                      | -                              | -                          |         |
| <b>Tobacco use</b>                           |                                |                            | <0.001  |
| No                                           | 919 (12%)                      | 410 (8%)                   |         |
| Yes                                          | 6506 (87%)                     | 4359 (91%)                 |         |
| Missing                                      | 81 (1%)                        | 47 (1%)                    |         |
| <b>BMI</b>                                   |                                |                            | <0.001  |
| Normal weight                                | 3570 (48%)                     | 2099 (42%)                 |         |
| Under weight                                 | 30 (0.4%)                      | 10 (0.2%)                  |         |
| Over weight                                  | 3325 (44%)                     | 2278 (47%)                 |         |
| Obesity                                      | 530 (7%)                       | 500 (10%)                  |         |
| Missing                                      | 51 (0.7%)                      | 19 (0.4%)                  |         |
| <b>Physical activity</b>                     |                                |                            | 0.04    |
| Moderate                                     | 1968 (26%)                     | 1209 (25%)                 |         |
| Low                                          | 2332 (31%)                     | 1509 (31%)                 |         |
| High                                         | 3192 (43%)                     | 2077 (43%)                 |         |
| Missing                                      | 14 (0.2%)                      | 21 (0.4%)                  |         |
| <b>Alcohol consumption</b>                   |                                |                            | <0.001  |
| No alcohol                                   | 147 (2%)                       | 116 (2%)                   |         |
| Alcohol                                      | 3343 (45%)                     | 1954 (41%)                 |         |
| Missing                                      | 4016 (53%)                     | 2746 (57%)                 |         |
| <b>Coffee consumption</b>                    |                                |                            | <0.001  |
| No coffee                                    | 471 (6%)                       | 311 (6%)                   |         |
| 1-2 cups a day                               | 1298 (17%)                     | 789 (16%)                  |         |
| 3-4 cups a day                               | 2595 (35%)                     | 1437 (30%)                 |         |
| 5+ cups a day                                | 3140 (42%)                     | 2272 (47%)                 |         |
| Missing                                      | 2 (0.03%)                      | 7 (0.2%)                   |         |
| <b>Previous cancer</b>                       |                                |                            | 0.14    |
| No                                           | 7319 (98%)                     | 4716 (98%)                 |         |
| Yes                                          | 187 (2%)                       | 100 (2%)                   |         |
| Missing                                      | -                              | -                          |         |
| <b>New cancer diagnosis during follow-up</b> |                                |                            | 0.16    |
| No cancer                                    | 6870 (92%)                     | 4419 (92%)                 |         |

|                                                          |           |           |      |
|----------------------------------------------------------|-----------|-----------|------|
| Prostate                                                 | 294 (4%)  | 160 (3%)  |      |
| Other cancer                                             | 342 (4%)  | 237 (5%)  |      |
| <b>Time to prostate cancer diagnosis<br/>(years(sd))</b> | 5.8 (2.7) | 6.1 (2.7) | 0.24 |

Significance levels based on t-tests or  $\chi^2$  tests.

For peer review only

**Table 2.** Hazard Ratios (HR) for shift work exposure groups applying multiple Cox analysis for prediction of prostate cancer<sup>1</sup> after baseline among male night workers, and with 95% Confidence Intervals (CI). Reference: non-exposed. N=12,322, Total number of cases=454.

|                                                                                                                                       | Duration of exposure, years | Cases/no cases | Complete follow-up HR (95% CI) <sup>a</sup> | Follow-up to 60 years HR (95% CI) <sup>b</sup> |
|---------------------------------------------------------------------------------------------------------------------------------------|-----------------------------|----------------|---------------------------------------------|------------------------------------------------|
| <b>No night work vs ever night work</b>                                                                                               |                             |                |                                             |                                                |
| No night work [ref]                                                                                                                   | 0                           | 294/7212       | 1                                           | 1                                              |
| Working nights for: (unadjusted)                                                                                                      | 1-45 years                  | 160/4656       | 0.84 (0.69-1.03)                            | <b>0.78 (0.64-0.96)</b>                        |
| No night work [ref]                                                                                                                   | 0                           | 294/7212       | 1                                           | 1                                              |
| Working nights for: (adjusted) <sup>2</sup>                                                                                           | 1-45 years                  | 160/4656       | 0.91 (0.74-1.12)                            | 0.89 (0.72-1.09)                               |
| <b>No night work vs years of shift work</b>                                                                                           |                             |                |                                             |                                                |
| No night work [ref]                                                                                                                   | 0 years                     | 294/7212       | 1                                           | 1                                              |
| Working nights for: (unadjusted)                                                                                                      | 1-5 years                   | 55/1729        | 0.79 (0.60-1.06)                            | <b>0.72 (0.54-0.96)</b>                        |
|                                                                                                                                       | 6-10 years                  | 31/800         | 0.99 (0.68-1.43)                            | 0.88 (0.61-1.27)                               |
|                                                                                                                                       | 11-20 years                 | 38/968         | 1.00 (0.72-1.41)                            | 0.84 (0.60-1.18)                               |
|                                                                                                                                       | 21-45 years                 | 36/1159        | 0.77 (0.55-1.09)                            | 0.86 (0.61-1.21)                               |
| No night work [ref]                                                                                                                   | 0 years                     | 294/7212       | 1                                           | 1                                              |
| Working nights for: (adjusted) <sup>2</sup>                                                                                           | 1-5 years                   | 55/1729        | 0.86 (0.63-1.17)                            | 0.84 (0.62-1.15)                               |
|                                                                                                                                       | 6-10 years                  | 31/800         | 1.09 (0.74-1.61)                            | 0.96 (0.65-1.42)                               |
|                                                                                                                                       | 11-20 years                 | 38/968         | 1.12 (0.78-1.63)                            | 1.11 (0.77-1.60)                               |
|                                                                                                                                       | 21-45 years                 | 36/1159        | 0.72 (0.50-1.05)                            | 0.75 (0.52-1.09)                               |
| Note: <sup>1</sup> no cancer as reference;                                                                                            |                             |                |                                             |                                                |
| <sup>2</sup> Adjusted for: age + education level + tobacco consumption + BMI + having children + coffee consumption + previous cancer |                             |                |                                             |                                                |
| <sup>a</sup> : follow-up until December 31 2010, <sup>b</sup> : follow-up until the age of 60.                                        |                             |                |                                             |                                                |



Table 3. Hazard Ratios (HR) for shift work exposure groups applying conditional Cox analysis of twin pairs discordant for prostate cancer<sup>1</sup> for prediction of prostate cancer after baseline among male night workers, and with 95% Confidence Intervals (CI). N=332.

|                     | <b>Duration of exposure, years</b> | <b>N (%)</b> | <b>Complete follow-up HR (95% CI)<sup>a</sup></b> | <b>Follow-up to 60 years HR (95% CI)<sup>b</sup></b> |
|---------------------|------------------------------------|--------------|---------------------------------------------------|------------------------------------------------------|
| No night work [ref] | 0 years                            | 225 (68)     | 1                                                 | 1                                                    |
| Working nights for: | 1-5 years                          | 42 (13)      | 1.02 (0.48-2.18)                                  | 0.88 (0.26-2.46)                                     |
|                     | 6-10 years                         | 19 (6)       | 1.97 (0.64-6.02)                                  | 1.24 (0.26-5.82)                                     |
|                     | 11-20 years                        | 22 (7)       | 0.88 (0.32-2.43)                                  | 0.87 (0.26-2.93)                                     |
|                     | 21-45 years                        | 24 (7)       | 1.05 (0.39-2.84)                                  | 0.57 (0.13-2.45)                                     |

Note: <sup>1</sup> no cancer as reference;  
<sup>a</sup>: follow-up until December 31 2010, <sup>b</sup>: follow-up until the age of 60.

STROBE Statement—Checklist of items that should be included in reports of *cohort studies*

|                              | Item No | Recommendation                                                                                                                                                                                                                                                                                                                                    |
|------------------------------|---------|---------------------------------------------------------------------------------------------------------------------------------------------------------------------------------------------------------------------------------------------------------------------------------------------------------------------------------------------------|
| <b>Title and abstract</b>    | 1       | (a) Indicate the study's design with a commonly used term in the title or the abstract p2<br>(b) Provide in the abstract an informative and balanced summary of what was done and what was found p2                                                                                                                                               |
| <b>Introduction</b>          |         |                                                                                                                                                                                                                                                                                                                                                   |
| Background/rationale         | 2       | Explain the scientific background and rationale for the investigation being reported p4                                                                                                                                                                                                                                                           |
| Objectives                   | 3       | State specific objectives, including any prespecified hypotheses p5                                                                                                                                                                                                                                                                               |
| <b>Methods</b>               |         |                                                                                                                                                                                                                                                                                                                                                   |
| Study design                 | 4       | Present key elements of study design early in the paper p6                                                                                                                                                                                                                                                                                        |
| Setting                      | 5       | Describe the setting, locations, and relevant dates, including periods of recruitment, exposure, follow-up, and data collection p6 & p8                                                                                                                                                                                                           |
| Participants                 | 6       | (a) Give the eligibility criteria, and the sources and methods of selection of participants. Describe methods of follow-up p6<br>(b) For matched studies, give matching criteria and number of exposed and unexposed na                                                                                                                           |
| Variables                    | 7       | Clearly define all outcomes, exposures, predictors, potential confounders, and effect modifiers. Give diagnostic criteria, if applicable p6-7                                                                                                                                                                                                     |
| Data sources/<br>measurement | 8*      | For each variable of interest, give sources of data and details of methods of assessment (measurement). Describe comparability of assessment methods if there is more than one group p6                                                                                                                                                           |
| Bias                         | 9       | Describe any efforts to address potential sources of bias p7                                                                                                                                                                                                                                                                                      |
| Study size                   | 10      | Explain how the study size was arrived at p6                                                                                                                                                                                                                                                                                                      |
| Quantitative variables       | 11      | Explain how quantitative variables were handled in the analyses. If applicable, describe which groupings were chosen and why p7-8                                                                                                                                                                                                                 |
| Statistical methods          | 12      | (a) Describe all statistical methods, including those used to control for confounding p7-8<br>(b) Describe any methods used to examine subgroups and interactions p8<br>(c) Explain how missing data were addressed p8<br>(d) If applicable, explain how loss to follow-up was addressed p8<br>(e) Describe any sensitivity analyses p9           |
| <b>Results</b>               |         |                                                                                                                                                                                                                                                                                                                                                   |
| Participants                 | 13*     | (a) Report numbers of individuals at each stage of study—eg numbers potentially eligible, examined for eligibility, confirmed eligible, included in the study, completing follow-up, and analysed p6<br>(b) Give reasons for non-participation at each stage p6<br>(c) Consider use of a flow diagram na                                          |
| Descriptive data             | 14*     | (a) Give characteristics of study participants (eg demographic, clinical, social) and information on exposures and potential confounders p8<br>(b) Indicate number of participants with missing data for each variable of interest na<br>(no missing data – complete follow-up)<br>(c) Summarise follow-up time (eg, average and total amount) p8 |
| Outcome data                 | 15*     | Report numbers of outcome events or summary measures over time p8                                                                                                                                                                                                                                                                                 |
| Main results                 | 16      | (a) Give unadjusted estimates and, if applicable, confounder-adjusted estimates and their precision (eg, 95% confidence interval). Make clear which confounders were                                                                                                                                                                              |

|                          |    |                                                                                                                                                                                       |
|--------------------------|----|---------------------------------------------------------------------------------------------------------------------------------------------------------------------------------------|
|                          |    | adjusted for and why they were included <b>p9</b>                                                                                                                                     |
|                          |    | (b) Report category boundaries when continuous variables were categorized <b>p7</b>                                                                                                   |
|                          |    | (c) If relevant, consider translating estimates of relative risk into absolute risk for a meaningful time period <b>na</b>                                                            |
| Other analyses           | 17 | Report other analyses done—eg analyses of subgroups and interactions, and sensitivity analyses <b>p9</b>                                                                              |
| <b>Discussion</b>        |    |                                                                                                                                                                                       |
| Key results              | 18 | Summarise key results with reference to study objectives <b>p10</b>                                                                                                                   |
| Limitations              | 19 | Discuss limitations of the study, taking into account sources of potential bias or imprecision. Discuss both direction and magnitude of any potential bias <b>p10-11</b>              |
| Interpretation           | 20 | Give a cautious overall interpretation of results considering objectives, limitations, multiplicity of analyses, results from similar studies, and other relevant evidence <b>p11</b> |
| Generalisability         | 21 | Discuss the generalisability (external validity) of the study results <b>p11</b>                                                                                                      |
| <b>Other information</b> |    |                                                                                                                                                                                       |
| Funding                  | 22 | Give the source of funding and the role of the funders for the present study and, if applicable, for the original study on which the present article is based <b>p12</b>              |

\*Give information separately for exposed and unexposed groups.

**Note:** An Explanation and Elaboration article discusses each checklist item and gives methodological background and published examples of transparent reporting. The STROBE checklist is best used in conjunction with this article (freely available on the Web sites of PLoS Medicine at <http://www.plosmedicine.org/>, Annals of Internal Medicine at <http://www.annals.org/>, and Epidemiology at <http://www.epidem.com/>). Information on the STROBE Initiative is available at <http://www.strobe-statement.org>.
